# Supplementary material for: Design of a catalyst through Fe doping of the boron cage B10H14for CO2hydrogenation and investigation of the catalytic character of iron hydride (Fe–H)
Source: Royal Society of Chemistry journal article supplement (doi:10.1039/c7cp05953a), 2017-01-01
Supplement: c7cp05953a1.pdf [file c7cp05953a1.pdf]

## Electronic supplementary information (ESI)

# Design of a catalyst through Fe doping boron cage B<sub>10</sub>H<sub>14</sub> for CO<sub>2</sub> hydrogenation and investigation of the catalysis character of iron hydride (Fe-H)

Lei Qian,<sup>a</sup> Kai-Yang Ma,<sup>a</sup> Zhong-Jun Zhou<sup>b</sup> and Fang Ma\*<sup>a</sup>

<sup>a</sup> School of Chemistry and Materials Science, Huaibei Normal University, Huaibei, 235000, China.

E-mail: mafangchem@foxmail.com.

<sup>b</sup> Institute of Theoretical Chemistry, Jilin University, Changchun, 130023, China.

Table S1. Comparisons of geometrical parameters (Å) of B<sub>10</sub>H<sub>14</sub> at different theory level and experimental data.

| bond                             | B <sub>10</sub> H <sub>14</sub> (exptl) <sup>a</sup> | B <sub>10</sub> H <sub>14</sub> <sup>b</sup> | B <sub>10</sub> H <sub>14</sub> <sup>c</sup> | B <sub>10</sub> H <sub>14</sub> <sup>d</sup> | B <sub>10</sub> H <sub>14</sub> <sup>e</sup> |
|----------------------------------|------------------------------------------------------|----------------------------------------------|----------------------------------------------|----------------------------------------------|----------------------------------------------|
| B <sub>2</sub> -B <sub>5</sub>   | 1.74±0.03                                            | 1.789                                        | 1.785                                        | 1.792                                        | 1.791                                        |
| B <sub>5</sub> -B <sub>6</sub>   | 1.76±0.03                                            | 1.786                                        | 1.780                                        | 1.790                                        | 1.790                                        |
| B <sub>5</sub> -B <sub>1</sub>   | 1.74±0.02                                            | 1.749                                        | 1.749                                        | 1.750                                        | 1.749                                        |
| B <sub>2</sub> -B <sub>1</sub>   | 1.79±0.04                                            | 1.781                                        | 1.778                                        | 1.785                                        | 1.785                                        |
| B <sub>6</sub> -B <sub>2</sub>   | 1.73±0.04                                            | 1.724                                        | 1.722                                        | 1.723                                        | 1.724                                        |
| B <sub>6</sub> -B <sub>7</sub>   | 1.78±0.03                                            | 1.786                                        | 1.780                                        | 1.790                                        | 1.790                                        |
| B <sub>7</sub> -B <sub>3</sub>   | 1.74±0.02                                            | 1.749                                        | 1.749                                        | 1.750                                        | 1.749                                        |
| B <sub>1</sub> -B <sub>3</sub>   | 1.78±0.02                                            | 1.776                                        | 1.774                                        | 1.784                                        | 1.784                                        |
| B <sub>9</sub> -B <sub>6</sub>   |                                                      | 3.592                                        | 3.582                                        | 3.595                                        | 3.595                                        |
| B <sub>7</sub> -B <sub>5</sub>   |                                                      | 2.837                                        | 2.829                                        | 2.845                                        | 2.845                                        |
| B <sub>7</sub> -B <sub>8</sub>   | 2.01±0.02                                            | 1.989                                        | 1.988                                        | 1.991                                        | 1.991                                        |
| B <sub>9</sub> -μ-H <sub>9</sub> | 1.40±0.05                                            | 1.333                                        | 1.333                                        | 1.335                                        | 1.335                                        |
| B <sub>8</sub> -μ-H <sub>9</sub> | 1.34±0.05                                            | 1.322                                        | 1.319                                        | 1.318                                        | 1.318                                        |
| B <sub>9</sub> -H <sub>9</sub>   | 1.25±0.05                                            | 1.190                                        | 1.188                                        | 1.181                                        | 1.181                                        |

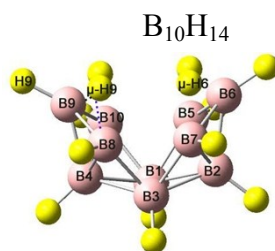

<sup>a</sup> For experimental data see ref: Gaines, D. F. *Inorg. Chem.* **2000**, *39*, 1812–1813. <sup>b</sup> At the CCSD/6-31+G\* level of theory. <sup>c</sup> At the MP2/6-31+G\* level of theory. <sup>d</sup> At the B3LYP/6-311+G(d,p) level of theory in this work. <sup>e</sup> At the B3LYP/6-311G(d,p) level of theory.

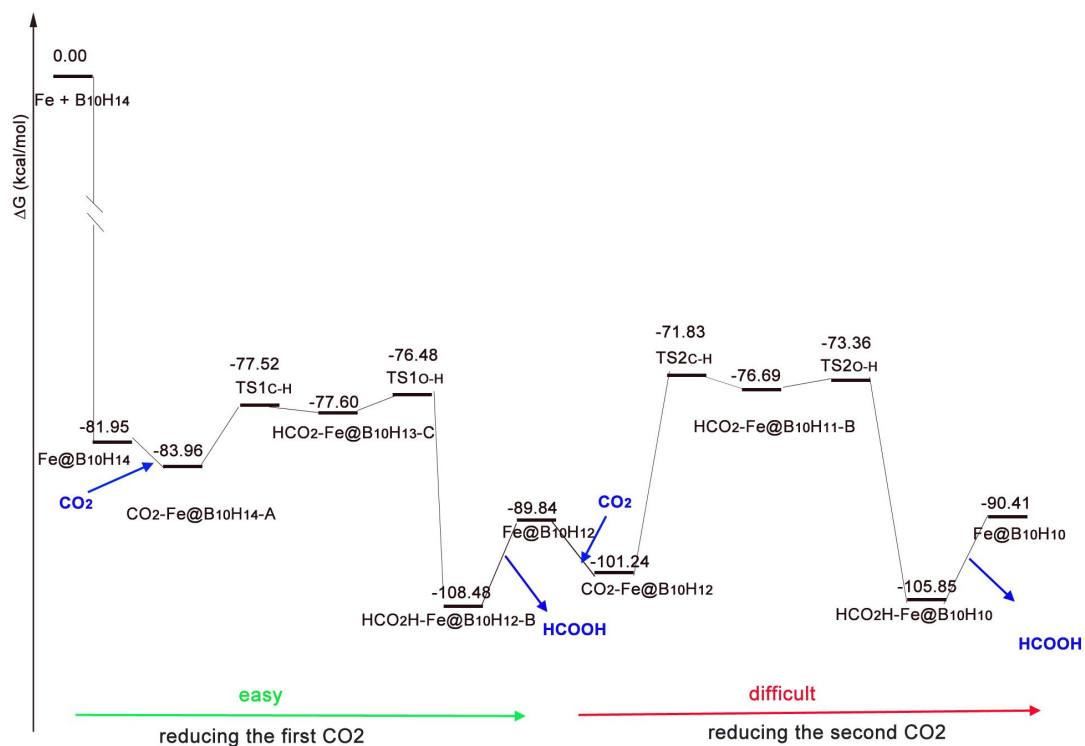

Fig S1. The whole free energy profile for an equivalent of Fe@B<sub>10</sub>H<sub>14</sub> reducing double CO<sub>2</sub> at the M06 level.

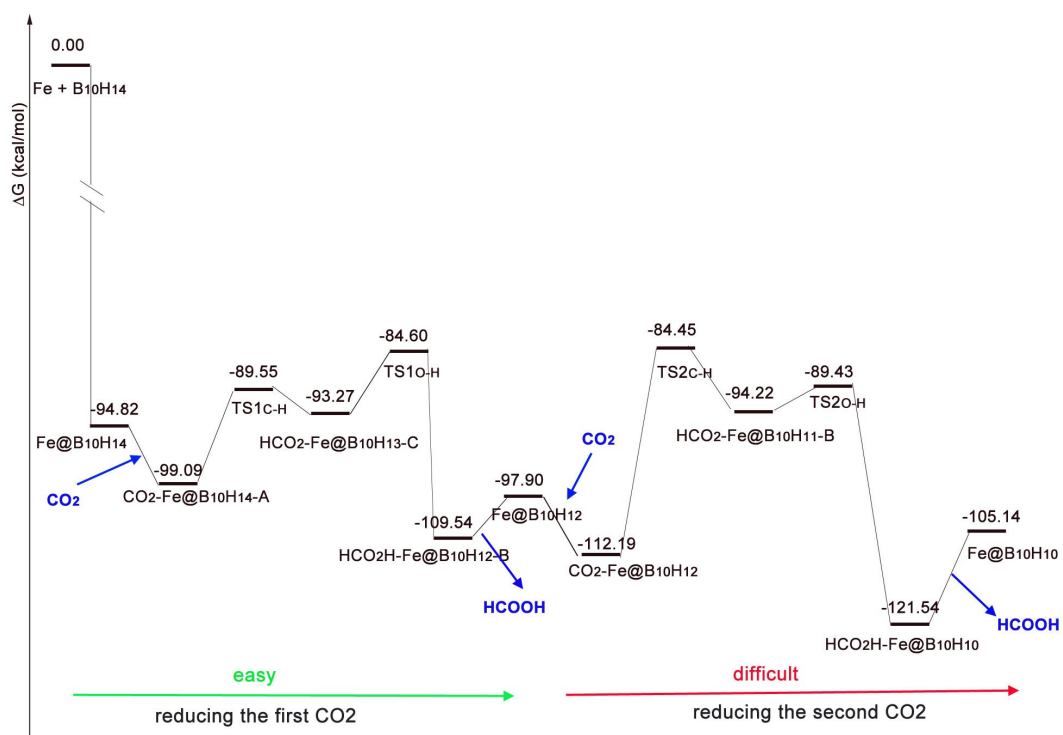

Fig S2. The whole free energy profile for an equivalent of Fe@B<sub>10</sub>H<sub>14</sub> reducing double CO<sub>2</sub> at the MP2 level.

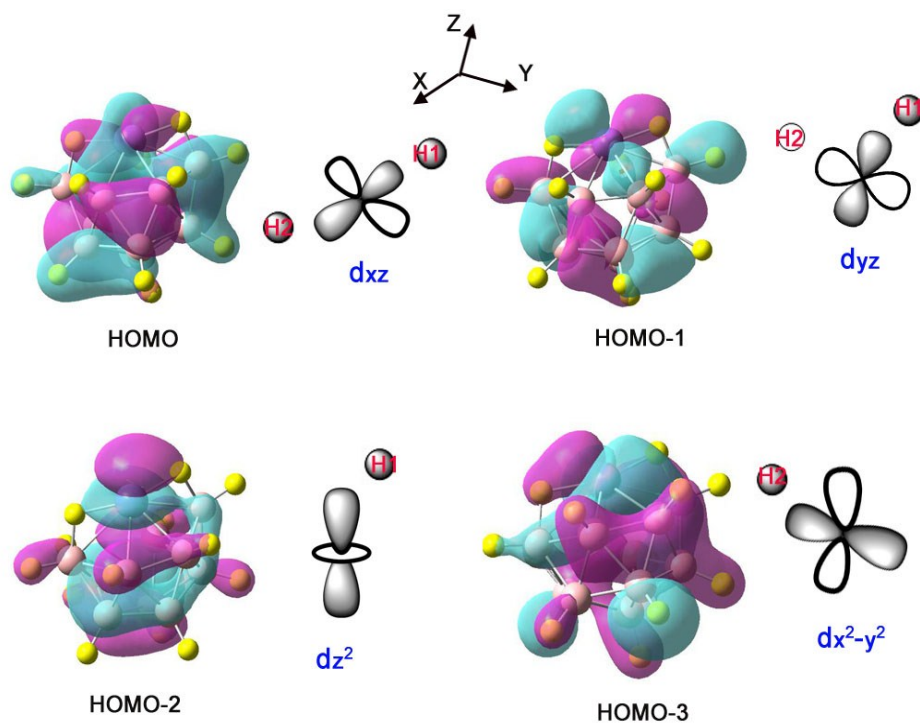

Fig S3. Different interaction modes between Fe atom with H1 and H2 atoms.

### Atomic coordinates of intermediates and key transition states

#### TS1<sub>C-H</sub>

|    |           |           |           |
|----|-----------|-----------|-----------|
| 5  | -2.839171 | 0.103640  | -0.282047 |
| 5  | -2.167462 | -1.495310 | 0.172936  |
| 5  | -2.219594 | -0.167457 | 1.360701  |
| 5  | -2.022763 | 1.424266  | 0.598671  |
| 5  | -1.826598 | -0.733075 | -1.436089 |
| 5  | -0.734884 | -1.095461 | 1.205119  |
| 5  | -0.639724 | 0.641249  | 1.384494  |
| 5  | -1.878177 | 1.240430  | -1.184750 |
| 1  | -3.977001 | 0.186145  | -0.601427 |
| 1  | -2.853256 | -2.452635 | 0.286368  |
| 1  | -2.910920 | -0.241241 | 2.317036  |
| 1  | -2.597364 | 2.356896  | 1.045947  |
| 1  | -2.080247 | -1.106537 | -2.529362 |
| 1  | -0.313010 | -1.829139 | 2.034436  |
| 1  | -0.047905 | 1.119370  | 2.290623  |
| 1  | -2.390861 | 1.922921  | -2.002605 |
| 5  | -0.474524 | 1.804398  | -0.133875 |
| 5  | -0.590440 | -1.614926 | -0.445085 |
| 1  | -0.151720 | 2.948124  | -0.118328 |
| 1  | 0.750973  | 1.372460  | -0.010114 |
| 1  | -0.610068 | 1.461141  | -1.424615 |
| 1  | -0.477515 | -0.708727 | -1.465826 |
| 1  | 1.803223  | -0.188025 | 1.041959  |
| 1  | 0.230980  | -2.439808 | -0.747285 |
| 26 | 0.838562  | -0.200271 | -0.141623 |
| 6  | 3.102547  | 0.086935  | 0.012140  |
| 8  | 2.571242  | 0.052478  | -1.086036 |
| 8  | 4.021363  | 0.199637  | 0.721695  |

#### TS1<sub>O-H</sub>

|   |          |           |           |
|---|----------|-----------|-----------|
| 5 | 1.557703 | 0.756380  | 1.450850  |
| 5 | 1.927609 | -0.963012 | 1.257811  |
| 5 | 2.702459 | 0.236360  | 0.201065  |
| 5 | 1.696966 | 1.693336  | -0.095320 |
| 5 | 0.221864 | -0.384704 | 1.328707  |
| 5 | 2.240672 | -1.318695 | -0.448120 |
| 5 | 1.957034 | 0.460551  | -1.371082 |
| 5 | 0.076549 | 1.291542  | 0.604280  |
| 1 | 1.859420 | 1.316931  | 2.446635  |
| 1 | 2.496969 | -1.529100 | 2.126935  |
| 1 | 3.876493 | 0.402381  | 0.188960  |

|    |           |           |           |
|----|-----------|-----------|-----------|
| 1  | 2.180044  | 2.772164  | -0.081552 |
| 1  | -0.542752 | -0.652697 | 2.193635  |
| 1  | 3.043890  | -2.041781 | -0.928238 |
| 1  | 2.437964  | 0.493460  | -2.451323 |
| 1  | -0.521890 | 2.177558  | 1.131411  |
| 5  | 0.409189  | 1.394038  | -1.147149 |
| 5  | 0.660903  | -1.743396 | 0.327365  |
| 1  | -0.169718 | 2.060862  | -1.937916 |
| 1  | 0.628843  | 0.183127  | -1.735458 |
| 1  | -1.320445 | 0.992080  | 0.304569  |
| 1  | -4.233390 | -0.415063 | 0.436149  |
| 1  | 1.121244  | -1.801187 | -0.919123 |
| 1  | 0.156169  | -2.807853 | 0.475938  |
| 6  | -3.204147 | -0.067461 | 0.290876  |
| 8  | -2.396221 | -0.921494 | -0.242627 |
| 8  | -2.861824 | 1.071466  | 0.617164  |
| 26 | -0.673783 | -0.358691 | -0.639971 |

**TS2<sub>C-H</sub>**

|    |           |           |           |
|----|-----------|-----------|-----------|
| 5  | 2.103888  | 0.414866  | 1.260622  |
| 5  | 2.010252  | -1.281109 | 0.721473  |
| 5  | 2.634410  | -0.004476 | -0.365176 |
| 5  | 1.930708  | 1.590379  | -0.082845 |
| 5  | 0.552269  | -0.449658 | 1.480764  |
| 5  | 1.506786  | -1.209421 | -1.010390 |
| 5  | 1.295183  | 0.519984  | -1.430632 |
| 5  | 0.535587  | 1.214219  | 1.030450  |
| 1  | 2.797151  | 0.711904  | 2.172361  |
| 1  | 2.700728  | -2.094384 | 1.234603  |
| 1  | 3.742918  | -0.067029 | -0.775082 |
| 1  | 2.604448  | 2.562462  | -0.134365 |
| 1  | 0.005398  | -0.735252 | 2.496231  |
| 1  | 1.736445  | -1.983908 | -1.877149 |
| 1  | 1.252370  | 0.738993  | -2.602492 |
| 1  | -0.100221 | 1.949533  | 1.712201  |
| 5  | 0.317147  | 1.716251  | -0.656438 |
| 5  | 0.410285  | -1.780109 | 0.361372  |
| 1  | -0.271168 | 2.649221  | -1.077782 |
| 1  | -1.532036 | 1.038078  | 0.055741  |
| 1  | 0.122098  | -1.516210 | -0.959229 |
| 1  | -0.135454 | -2.809258 | 0.549142  |
| 26 | -0.567105 | -0.077085 | -0.400876 |
| 6  | -2.787084 | 0.045550  | 0.153716  |
| 8  | -2.345755 | -0.998435 | -0.301656 |

|                              |           |           |           |
|------------------------------|-----------|-----------|-----------|
| 8                            | -3.649372 | 0.693449  | 0.607585  |
| <b>TS<sub>2O-H</sub></b>     |           |           |           |
| 5                            | 1.877191  | 0.972382  | 1.107290  |
| 5                            | 2.244930  | -0.768049 | 0.973859  |
| 5                            | 2.608352  | 0.349394  | -0.375086 |
| 5                            | 1.444307  | 1.700571  | -0.473048 |
| 5                            | 0.597258  | -0.179844 | 1.577691  |
| 5                            | 1.750884  | -1.157617 | -0.739002 |
| 5                            | 1.239576  | 0.246651  | -1.542919 |
| 5                            | 0.173160  | 1.339529  | 0.762547  |
| 1                            | 2.402565  | 1.629739  | 1.939665  |
| 1                            | 3.088955  | -1.278598 | 1.630842  |
| 1                            | 3.731330  | 0.539198  | -0.694174 |
| 1                            | 1.799840  | 2.782795  | -0.799419 |
| 1                            | 0.050283  | -0.376646 | 2.612262  |
| 1                            | 2.054594  | -2.104270 | -1.389882 |
| 1                            | 1.236460  | 0.218305  | -2.731427 |
| 1                            | -0.494005 | 2.100698  | 1.379293  |
| 5                            | -0.115379 | 1.235667  | -1.010520 |
| 5                            | 0.816534  | -1.621242 | 0.641227  |
| 1                            | -0.905181 | 1.760155  | -1.718502 |
| 1                            | -1.214652 | 0.974384  | 0.135114  |
| 1                            | -4.163257 | -0.260268 | 0.264693  |
| 1                            | 0.169319  | -2.625107 | 0.702943  |
| 26                           | -0.460926 | -0.619401 | -0.339936 |
| 6                            | -3.108037 | 0.023177  | 0.179156  |
| 8                            | -2.300507 | -0.923777 | -0.170165 |
| 8                            | -2.737994 | 1.175998  | 0.397888  |
| <b>TS<sub>H-adsorb</sub></b> |           |           |           |
| 5                            | -1.757850 | 0.265788  | 1.008711  |
| 5                            | -1.115167 | 1.600655  | 0.010235  |
| 5                            | -1.794632 | 0.142802  | -0.767498 |
| 5                            | -1.556186 | -1.338099 | 0.222846  |
| 5                            | -0.129121 | 0.937489  | 1.390771  |
| 5                            | -0.184948 | 0.750790  | -1.305217 |
| 5                            | -0.472635 | -0.945853 | -1.215167 |
| 5                            | -0.415423 | -0.754583 | 1.547244  |
| 1                            | -2.700144 | 0.473802  | 1.695502  |
| 1                            | -1.675065 | 2.644448  | -0.050449 |
| 1                            | -2.765023 | 0.256897  | -1.436969 |
| 1                            | -2.377497 | -2.189346 | 0.298800  |
| 1                            | 0.278401  | 1.469553  | 2.375545  |
| 1                            | 0.180123  | 1.140953  | -2.369852 |

|                          |           |           |           |
|--------------------------|-----------|-----------|-----------|
| 1                        | -0.271300 | -1.575191 | -2.203335 |
| 1                        | -0.171735 | -1.242357 | 2.603545  |
| 5                        | 0.095560  | -1.704716 | 0.214067  |
| 5                        | 0.593170  | 1.646994  | -0.028352 |
| 1                        | 1.116477  | -2.363232 | 0.238402  |
| 1                        | 1.338212  | 2.564648  | -0.107332 |
| 26                       | 1.205998  | -0.234863 | 0.089226  |
| 1                        | 3.082954  | 0.257277  | 0.016041  |
| 1                        | 2.720044  | 0.939390  | -0.023053 |
| <b>TS2<sub>H-H</sub></b> |           |           |           |
| 5                        | 1.677963  | -0.003913 | 1.018174  |
| 5                        | 1.258104  | -1.486339 | 0.122645  |
| 5                        | 1.809523  | -0.006295 | -0.735858 |
| 5                        | 1.293189  | 1.475087  | 0.075438  |
| 5                        | 0.158908  | -0.831926 | 1.386901  |
| 5                        | 0.453680  | -0.917145 | -1.406947 |
| 5                        | 0.374985  | 0.861241  | -1.366831 |
| 5                        | 0.181230  | 0.883553  | 1.359381  |
| 1                        | 2.591474  | 0.016056  | 1.769443  |
| 1                        | 1.937261  | -2.450757 | 0.217642  |
| 1                        | 2.819084  | -0.044464 | -1.349942 |
| 1                        | 1.998159  | 2.423926  | 0.124248  |
| 1                        | -0.209706 | -1.355123 | 2.386369  |
| 1                        | 0.471535  | -1.510798 | -2.434141 |
| 1                        | 0.220381  | 1.420707  | -2.406216 |
| 1                        | -0.236574 | 1.444909  | 2.317513  |
| 5                        | -0.398994 | 1.892923  | -0.104915 |
| 5                        | -0.476212 | -1.860965 | 0.051917  |
| 1                        | -0.643530 | 3.052418  | -0.146316 |
| 1                        | -1.650474 | 1.494842  | 0.222062  |
| 1                        | -0.876367 | -1.147433 | -1.196210 |
| 1                        | -0.807202 | -2.992522 | -0.027434 |
| 26                       | -1.270017 | 0.029789  | -0.105570 |
| 1                        | -1.815281 | -1.299473 | 0.446008  |
| 1                        | -2.440198 | 0.142092  | 0.822257  |
